# Supplementary material for: Repeatedly measured predictors: a comparison of methods for prediction modeling
Source: PubMed Central journal article supplement (PMC6460730; doi:10.1186/s41512-018-0024-7), 2018-02-13
Supplement: 41512_2018_24_MOESM1_ESM.pdf [file 41512_2018_24_MOESM1_ESM.pdf]

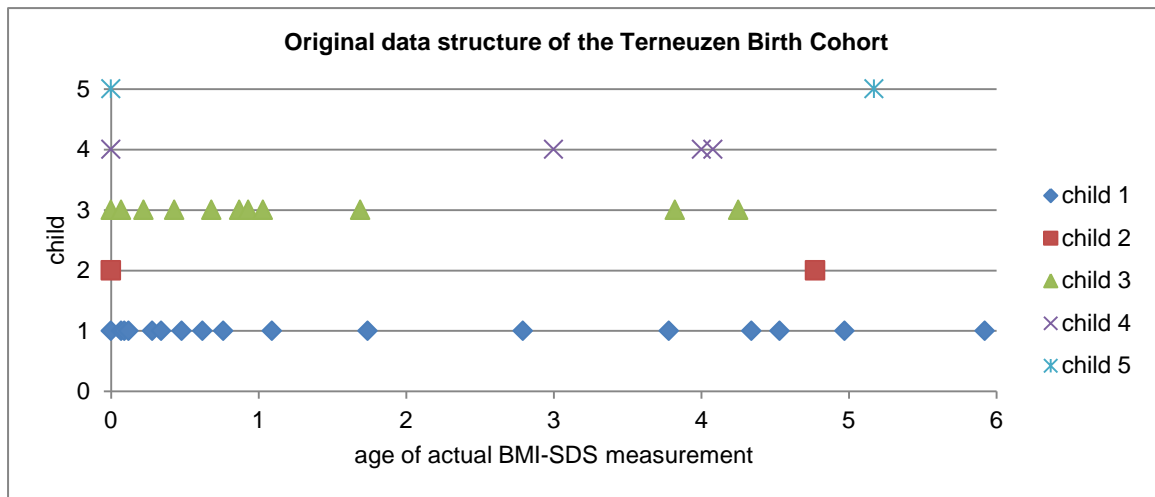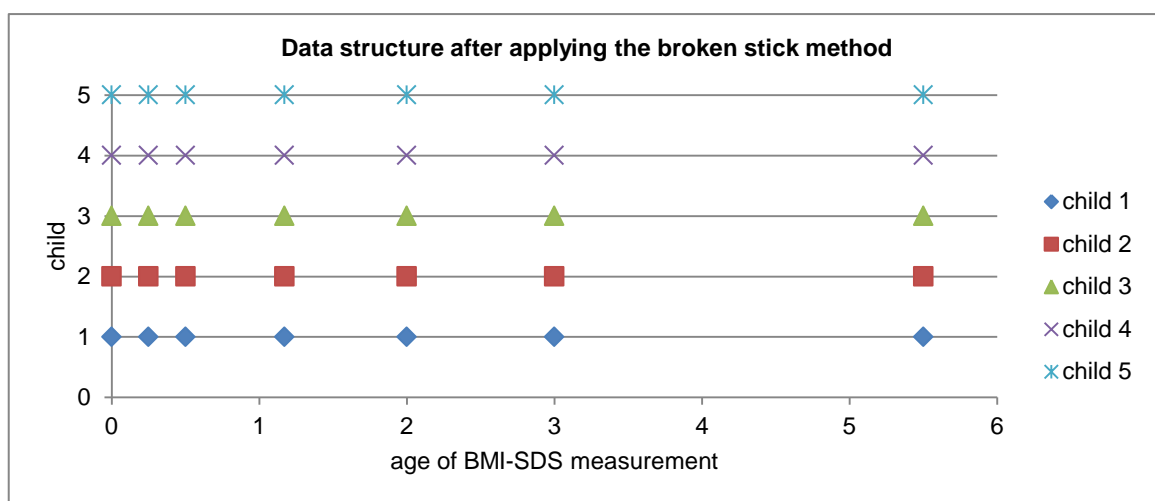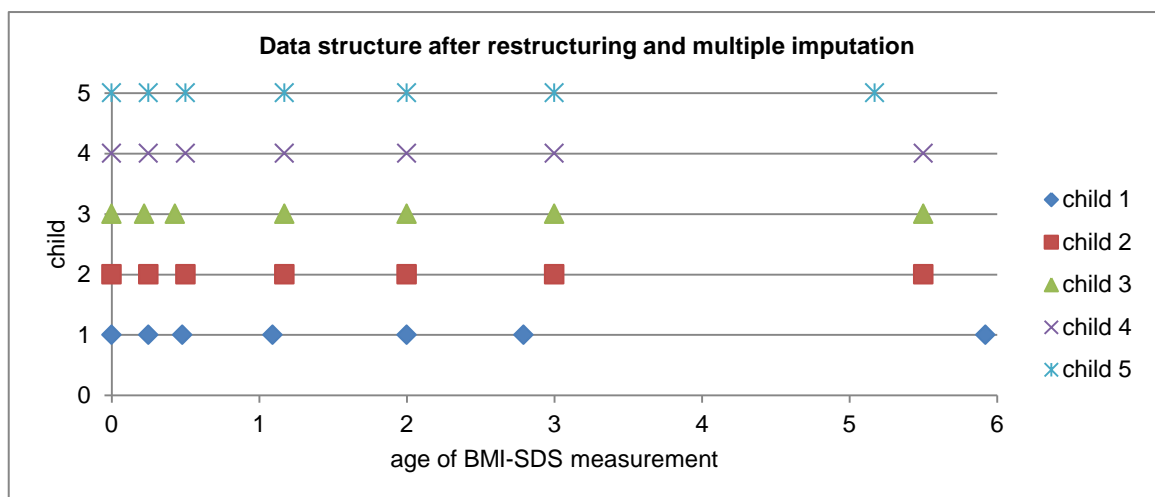

**Additional file 1.** The structure of the original Terneuzen Birth Cohort data, the broken stick data, and the multiple imputed-data; Timing of BMI-SDS measurement for five selected participants of the Terneuzen Birth Cohort.
